# Supplementary material
Source: Research Square preprint supplement (doi:10.21203/rs.3.rs-9384634/v1)
Supplement: Supplementary file 1 [file 1d52bf84394e344d4523d015.xlsx]

## Sheet: primer
Supplemeary Table 1. Primers used for RT-qPCR assay
mRNA primers	Primer sequence (5’- 3’)
MS-Iba1-F	5'- CTTCAGCTCTAGATGGGTCTTGG -3'
MS-Iba1-R	5'- AAGAGAGGTTGGATGGGATCAAC -3'
MS-Tnf-α-F	5'- AGGCACTCCCCCAAAAGA -3'
MS-Tnf-α-R	5'- ACTGATGAGAGGGAGGCCAT -3'
MS-iNOS-F	5'- CTATGGCCGCTTTGATGTGC -3'
MS-iNOS-R	5'- TTGGGATGCATGAC -3'
MS-Cox-2-F	5'- TGAGTACCGCAAACGCTTCT -3'
MS-Cox-2-R	5'- CAGCCATTTCCTTCTCTCCTGT -3'
MS-Il-1β-F	5'- GGGCTGCTTCCAAACCTTTG -3'
MS-Il-1β-R	5'- AAGACACAGGTAGCTGCCAC -3'
MS-Tgf-β1-F	5'- AGGAGACGGAATACAGGGCT -3'
MS-Tgf-β1-R	5'- GGATCCACTTCCAACCCAGG -3'
MS-Il-4-F	5'- CCATATCCACGGATGCGACA -3'
MS-Il-4-R	5'- AGGACGTTTGGCACATCCAT -3'
MS-Il-6-F	5'- GCCTTCTTGGGACTGATGCT -3'
MS-Il-6-R	5'- AGCCTCCGACTTGTGAAGTG -3'
MS-Cxcl1-F	5'- CATGGCTGGGATTCACCTCA -3'
MS-Cxcl1-R	5'- CCTCGCGACCATTCTTGAGT -3'
MS-Cxcl2-F	5'- CCTGCCAAGGGTTGACTTCA -3'
MS-Cxcl2-R	5'- GCAAACTTTTTGACCGCCCT -3'
MS-Ccl2-F	5'- CAGCCAGATGCAGTTAACGC -3'
MS-Ccl2-R	5'- GCTGCTGGTGATCCTCTTGT -3'
MS-Ccl3-F	5'- ATGAAGGTCTCCACCACTGC -3'
MS-Ccl3-R	5'- TCAGGCATTCAGTTCCAGGTC -3'
MS-Ccl4-F	5'- TGTCTGCCCTCTCTCTCCTC -3'
MS-Ccl4-R	5'- AAACAGCAGGAAGTGGGAGG -3'
MS-Gapdh-F	5'- GTGGCAAAGTGGAGATTGTTG -3'
MS-Gapdh-R	5'- CGTTGAATTTGCCGTGAGTG -3'
