# Supplementary material
Source: Research Square preprint supplement (doi:10.21203/rs.3.rs-9384634/v1)
Supplement: Supplementary file 1 [file 6f211210568bdc6b45979389.pdf]

## Supplemental Information

### Early-Life Stress Drives Anxiety and Irritable Bowel Syndrome-Like Gastrointestinal Dysfunction via Microglial Activation and Gut Microbiota Dysbiosis

Min Chen<sup>1#</sup>, Yuzhou Xiao<sup>2#</sup>, Can Yang<sup>3</sup>, Xiaodan Pan<sup>2</sup>, Wenjing Xu<sup>2</sup>, Yue Zhao<sup>2</sup>,  
Xiaofeng Yang<sup>2</sup>, Dongming Wu<sup>3\*</sup>, Ying Xu<sup>3\*</sup>, Liang Wang<sup>4\*</sup>

<sup>1</sup> School of Biosciences and Technology, Chengdu Medical College, Chengdu, 610500, Sichuan, China. Fax: 028-62739582

<sup>2</sup> Mental Health Center and National Chengdu Center for Safety Evaluation of Drugs, State Key Laboratory of Biotherapy, West China Hospital of Sichuan University, Chengdu 610041, China. Fax: 028-85367881

<sup>3</sup> School of Clinical Medicine & The First Affiliated Hospital of Chengdu Medical College, Chengdu 610500, China. Fax: 028-83016721

<sup>4</sup> Department of Neurosurgery, Xinqiao Hospital, Army Medical University, Chongqing 400037, China. Fax: 023-772314

# These authors contributed equally to this work

\* Corresponding author

E-mail & ORCID:

Min Chen, cmmm0929@yeah.net; 0009-0006-8025-9734

Yuzhou Xiao, microcosmos@foxmail.com; 0000-0001-8934-4448

Can Yang, 19102824669@163.com; 0009-0000-4024-0576

Xiaodan Pan, 15892422012@163.com; 0009-0003-7127-4316

Wenjing Xu, melissa1522@foxmail.com; 0009-0006-8025-9734

Yue Zhao, homefly@foxmail.com; 0000-0001-8676-4949

Xiaofeng Yang, yxf2023224065148@163.com; 0009-0008-6178-9080

Dongming Wu, dongmingwu@cmc.edu.cn; 0000-0002-5806-5646

Ying Xu, yingxu@cmc.edu.cn; 0000-0001-9570-8666

Liang Wang, liangwang@tmmu.edu.cn; 0000-0003-4988-2190

# Supplementary Figure 1

## Figure 2F

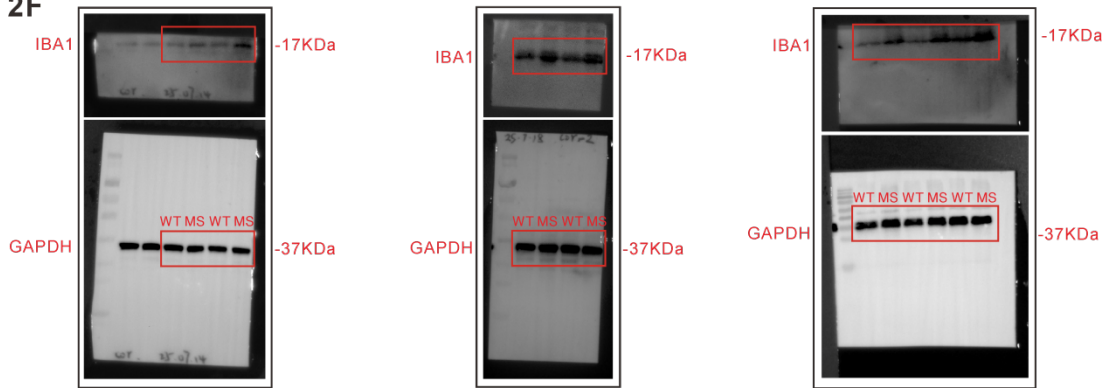

## Figure 3M

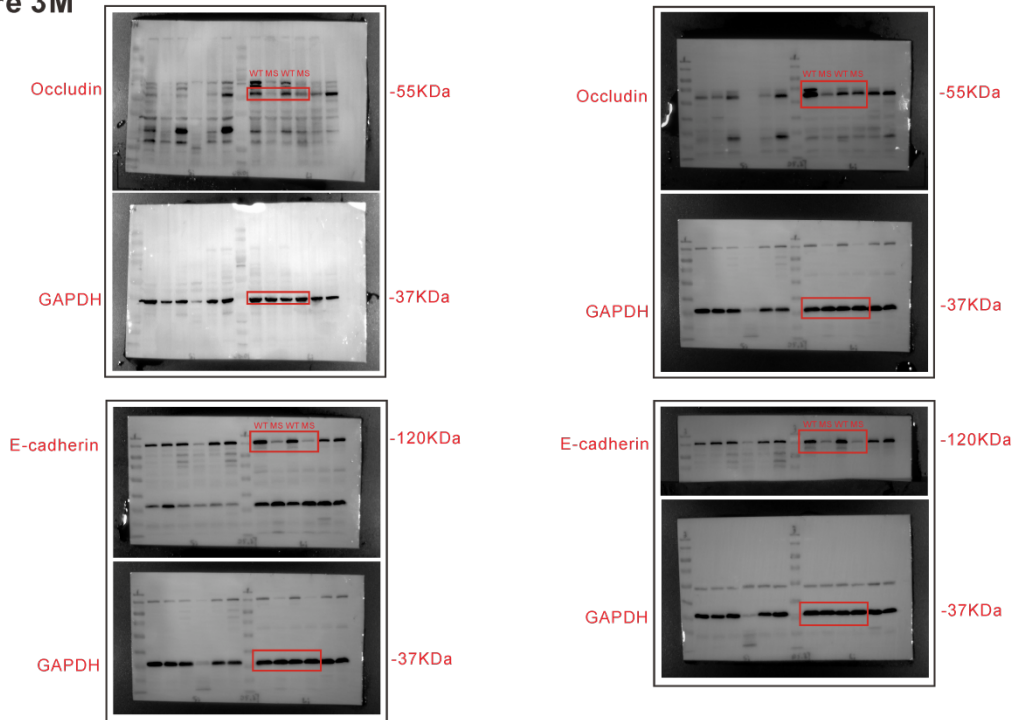

## Figure 5F

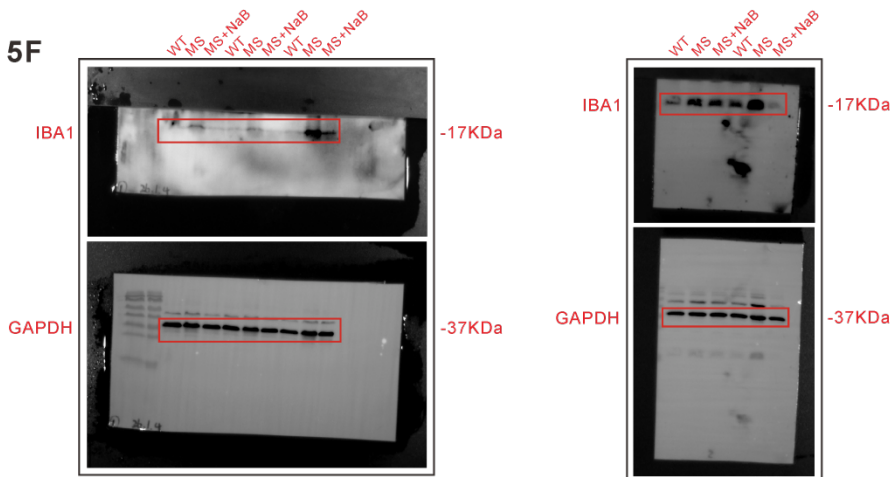

**Supplementary Figure 1. Raw Western blot images of the indicated figures.**

**Supplementary Figure 2**

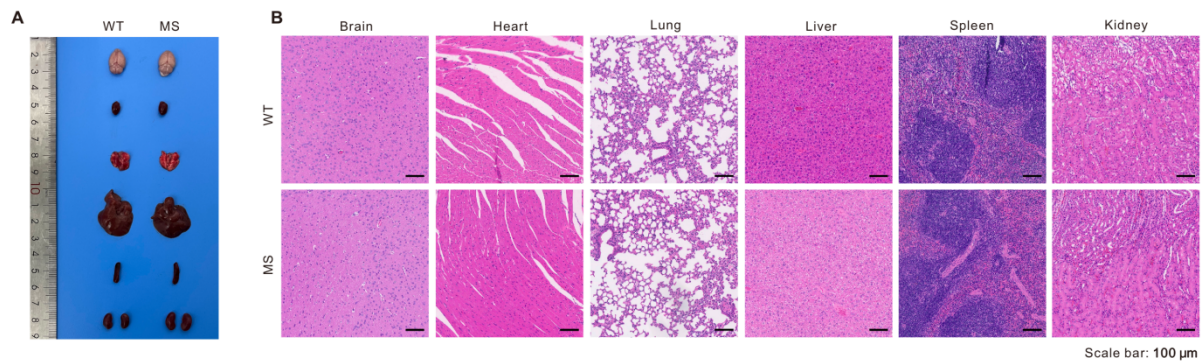

**Supplementary Figure 2. Maternal separation did not produce evident morphological abnormalities in major organs.** (A) Representative photographs showing the gross morphology of different mouse tissues. (B) Representative H&E-stained micrographs displaying the tissue architecture and cellular morphology of multiple mouse tissues. Scale bars, 100 μm.

**Supplementary Figure 3**

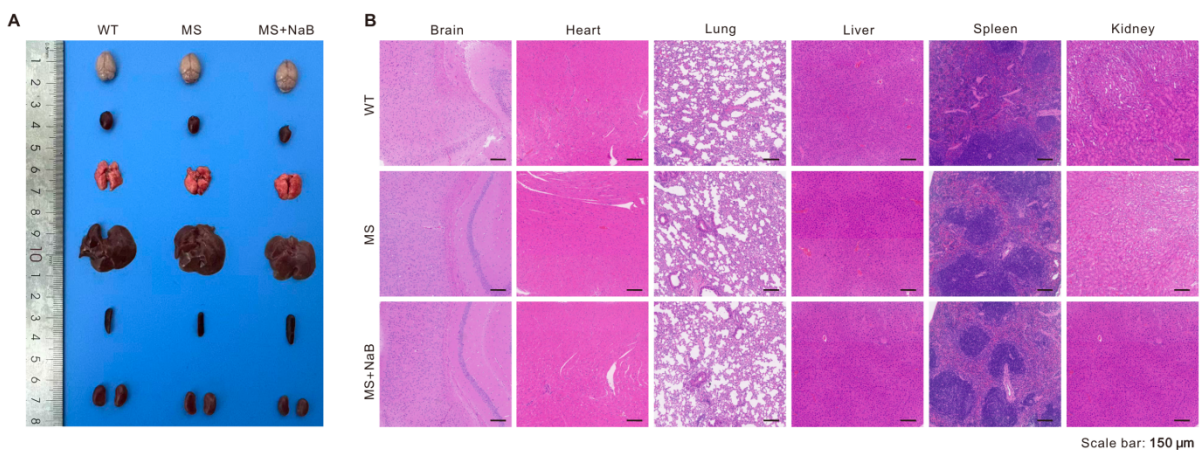

**Supplementary Figure 3. Oral administration of sodium butyrate showed no evident toxicity in major organs.** (A) Representative photographs showing the gross morphology of different mouse tissues. (B) Representative H&E-stained micrographs displaying the tissue architecture and cellular morphology of multiple mouse tissues. Scale bars, 150 μm.
