# Supplementary material
Source: Research Square preprint supplement (doi:10.21203/rs.3.rs-9384634/v1)
Supplement: Supplementary file 2 [file 5da5912f52bb2382dadb0555.xlsx]

## Sheet: Figure 1
Panel	Input data	Test for normal distribution	W value (Shapiro-Wilk test)	P value for normality test	Passed normality	P value (F test to compare variances)	Passed F test	Statistical method	p value or adjusted p value	WT (n)	MS (n)
B: Body weight	WT; MS:D28	Shapiro-Wilk test	0.8201; 0.8515	0.0644; 0.1269	Yes; Yes	-	-	Two-way ANOVA with Sidak’s multiple comparisons test	t(266)=3.006; p=0.0201	20	20
	WT; MS:D29								t(266)=2.773; p=0.0409
	WT; MS:D30								t(266)=2.842; p=0.0333
	WT; MS:D31								t(266)=2.997; p=0.0207
	WT; MS:D32								t(266)=3.291; p=0.0079
	WT; MS:D33								t(266)=3.162; p=0.0122
	WT; MS:D34								t(266)=3.35; p=0.0065
C	No. of entries into center area: WT vs MS	Shapiro-Wilk test	0.9424; 0.9573	0.5301; 0.7441	Yes; Yes	0.2803	Yes	Two-tailed unpaired t-test	t(22)=0.3915; p=0.6992	12	12
	Duration in center area: WT vs MS	Shapiro-Wilk test	0.9617; 0.9573	0.8080; 0.7441	Yes; Yes	0.1112	Yes	Two-tailed unpaired t-test	t(22)=1.240; p=0.2279
	Total traveled distance: WT vs MS	Shapiro-Wilk test	0.9023; 0.9434	0.1698; 0.5439	Yes; Yes	0.3506	Yes	Two-tailed unpaired t-test	t(22)=0.1730; p=0.8643
E	No. of entries into the closed arms: WT vs MS	Shapiro-Wilk test	0.9321; 0.9031	0.4031; 0.1741	Yes; Yes	0.0467	No	Two tailed Welch's correction	t(16.75)=0.8104; p=0.4291	12	12
	Duration in the closed arms: WT vs MS	Shapiro-Wilk test	0.9323; 0.9511	0.4049;0.6526	Yes; Yes	0.4105	Yes	Two-tailed unpaired t-test	t(22)=4.083; p=0.0005
	Total distance traveled in the closed arms: WT vs MS	Shapiro-Wilk test	0.8988; 0.8751	0.1532; 0.0759	Yes; Yes	0.1354	Yes	Two-tailed unpaired t-test	t(22)=3.373; p=0.0027
	No. of entries into the open arms: WT vs MS	Shapiro-Wilk test	0.7641; 0.9160	0.0038; 0.2543	No; Yes	0.0173	No	Two tailed Kolmogorov-Smirnov test	D=0.5833; p=0.0337
	Duration in the open arms: WT vs MS	Shapiro-Wilk test	0.9566; 0.927	0.7349; 0.3497	Yes; Yes	0.9365	Yes	Two-tailed unpaired t-test	t(22)=5.270; p<0.0001
	Total distance traveled in the open arms: WT vs MS	Shapiro-Wilk test	0.9046; 0.8716	0.1816; 0.0684	Yes; Yes	0.7951	Yes	Two-tailed unpaired t-test	t(22)=3.278; p=0.0034
F	Ratio of sucrose preference: WT vs MS	Shapiro-Wilk test	0.9005; 0.9597	0.1611; 0.7793	Yes; Yes	0.7463	Yes	Two-tailed unpaired t-test	t(22)=3.425; p=0.0024	12	12
G	Total immobility time: WT vs MS	Shapiro-Wilk test	0.8827; 0.8977	0.095; 0.1483	Yes; Yes	0.2743	Yes	Two-tailed unpaired t-test	t(22)=2.253; p=0.0346	12	12
H	Total immobility time: WT vs MS	Shapiro-Wilk test	0.9572; 0.8641	0.7427; 0.0551	Yes; Yes	0.4525	Yes	Two-tailed unpaired t-test	t(22)=0.4207; p=0.6781	12	12
I	No. of GFAP+ cells: WT vs MS	Shapiro-Wilk test	0.9603; 0.8983	0.7895; 0.2101	Yes; Yes	0.7687	Yes	Two-tailed unpaired t-test	t(18)=0.8325; p=0.416	10	10
J	No. of NeuN+ cells: WT vs MS	Shapiro-Wilk test	0.927; 0.9025	0.4187; 0.2333	Yes; Yes	0.5166	Yes	Two-tailed unpaired t-test	t(18)=0.2918; p=0.7738	10	10
K	MBP area: WT vs MS	Shapiro-Wilk test	0.9266; 0.9257	0.2425; 0.2352	Yes; Yes	0.3975	Yes	Two-tailed unpaired t-test	t(28)=1.836; p=0.077	15	15
L	No. of Iba1+ cells: WT vs MS	Shapiro-Wilk test	0.9078; 0.9621	0.2661; 0.8097	Yes; Yes	0.3788	Yes	Two-tailed unpaired t-test	t(18)=4.339; p=0.0004	10	10

## Sheet: Figure 2
Panel	Input data	Test for normal distribution	W value (Shapiro-Wilk test)	P value for normality test	Passed normality	P value (F test to compare variances)	Passed F test	Statistical method	p value or adjusted p value	WT (n)	MS (n)
B	Total intersections per cell: WT vs MS	Shapiro-Wilk test	0.9278； 0.9309	0.0773； 0.0911	Yes; Yes	0.6305	Yes	Two-tailed unpaired t-test	t(48)=3.417; p=0.0013	25	25
C	Maximum dendrite volume: WT vs MS	Shapiro-Wilk test	0.9551; 0.9322	0.326; 0.0978	Yes; Yes	0.2798	Yes	Two-tailed unpaired t-test	t(48)=2.226; p=0.0308	25	25
	Total branch length: WT vs MS	Shapiro-Wilk test	0.9051; 0.9563	0.0237; 0.3464	No; Yes	0.5435	Yes	Two tailed Mann-Whitney U test	U=133; p=0.0003	25	25
	Iba1+ cell bodies volume: WT vs MS	Shapiro-Wilk test	0.9854; 0.9834	0.9431; 0.9068	Yes; Yes	0.8159	Yes	Two-tailed unpaired t-test	t(58)=2.747; p=0.008	30	30
	Maximum dendrite length: WT vs MS	Shapiro-Wilk test	0.7011; 0.4013	0.0584; 0.3336	Yes; Yes	0.1571	Yes	Two-tailed unpaired t-test	t(46)=2.284; p=0.027	24	24
	No. of branch points: WT vs MS	Shapiro-Wilk test	0.8752; 0.8962	0.0055; 0.0152	No; No	0.7181	Yes	Two tailed Mann-Whitney U test	U=136; p=0.0004	25	25
D	Fluorescence intensity of Iba1: WT vs MS	Shapiro-Wilk test	0.9426； 0.961	0.1866； 0.4596	Yes; Yes	0.6187	Yes	Two-tailed unpaired t-test	t(46)=5.032; p<0.0001	24	24
E	Relative mRNA level of Iba1: WT vs MS	Shapiro-Wilk test	0.8807； 0.8719	0.3415； 0.3053	Yes; Yes	0.4876	Yes	Two-tailed unpaired t-test	t(6)=4.112; p=0.0063	4	4
F	Relative protein level of Iba1: WT vs MS	Shapiro-Wilk test	0.9287	0.5396	Yes	<0.0001	No	Two tailed Welch's correction	t(6)=4.047; p=0.0067	7	7
H： Relative mRNA level of cytokines	Tnf-α: WT vs MS	Shapiro-Wilk test	0.9109； 0.966	0.4874；0.8164	Yes; Yes	-	-	Two-way ANOVA with Sidak’s multiple comparisons test	t(32)=4.232; p=0.0007	5	5
	iNOS: WT vs MS								t(32)=4.464; p=0.0004
	Cox-2: WT vs MS								t(32)=3.581; p=0.0045
	Il-1β: WT vs MS								t(32)=4.588; p=0.0003
J:Iba1+ cell bodies volume	D24: WT vs MS	Kolmogorov-Smirnov test	0.09755； 0.07997	>0.1000； >0.1000	Yes; Yes	0.0277	No	Two tailed Welch's correction	t(109.3)=0.7770; p=0.4388	60	60
	D56: WT vs MS	Kolmogorov-Smirnov test	0.06436; 0.09303	>0.1000； >0.1000	Yes; Yes	0.8314	Yes	Two-tailed unpaired t-test	t(118)=2.726; p=0.0074
	D72: WT vs MS	Kolmogorov-Smirnov test	0.08857； 0.1506	>0.1000； 0.0017	Yes; No	0.007	No	Two tailed Kolmogorov-Smirnov test	D=0.3000; p=0.0090
K: No. of Iba1+ cells	D24: WT vs MS	Shapiro-Wilk test	0.9579； 0.9068	0.7618； 0.2596	Yes; Yes	0.405	Yes	Two-tailed unpaired t-test	t(18)=3.111; p=0.006	10	10
	D56: WT vs MS	Shapiro-Wilk test	0.9366； 0.9513	0.5157； 0.6834	Yes; Yes	0.7949	Yes	Two-tailed unpaired t-test	t(18)=1.233; p=0.2334
	D72: WT vs MS	Shapiro-Wilk test	0.933； 0.8761	0.4776； 0.1178	Yes; Yes	0.8946	Yes	Two-tailed unpaired t-test	t(18)=2.493; p=0.0226
L	TNF-α in serum: WT vs MS	Shapiro-Wilk test	0.7921; 0.9475	0.0499; 0.7196	No; Yes	0.6776	Yes	Two tailed Mann-Whitney U test	U=0; p=0.0022	6	6
	IL-1β in serum: WT vs MS	Shapiro-Wilk test	0.8763, 0.7566	0.2524; 0.0231	Yes; No	0.0842	Yes	Two tailed Mann-Whitney U test	U=0; P=0.0022
	COX-2 in serum: WT vs MS	Shapiro-Wilk test	0.9306; 0.8955	0.585; 0.3481	Yes; Yes	0.6848	Yes	Two-tailed unpaired t-test	t(10)=7.779; p<0.0001
M	5-HT in serum: WT vs MS	Shapiro-Wilk test	0.9666; 0.8973	0.8686; 0.3582	Yes; Yes	0.0004	No	Two tailed Welch's correction	t(5.172)=4.574; p=0.0055	6	6

## Sheet: Figure 3
Panel	Input data	Test for normal distribution	W value (Shapiro-Wilk test)	P value for normality test	Passed normality	P value (F test to compare variances)	Passed F test	Statistical method	p value or adjusted p value	WT (n)	MS (n)
A: No. of fecal particles	WT; MS:D28	Shapiro-Wilk test	0.9326； 0.9785	0.5735； 0.9517	Yes; Yes	-	-	Two-way ANOVA with Sidak’s multiple comparisons test	t(42)=2.269; p=0.183	4	4
	WT; MS:D29								t(42)=0.6078; p=0.9961
	WT; MS:D30								t(42)=0.6888; p=0.9916
	WT; MS:D31								t(42)=0.6078; p=0.9961
	WT; MS:D32								t(42)=1.094; p=0.8999
	WT; MS:D33								t(42)=1.742; p=0.4783
	WT; MS:D34								t(42)=0.6078; p=0.9961
B:Percentage of stool water	WT; MS:D28	Shapiro-Wilk test	0.8577; 0.9684	0.1444; 0.887	Yes; Yes	-	-	Two-way ANOVA with Sidak’s multiple comparisons test	t(84)=5.889; p<0.0001	7	7
	WT; MS:D29								t(84)=0.7517; p=0.9856
	WT; MS:D30								t(84)=0.372; p=0.9998
	WT; MS:D31								t(84)=1.104; p=0.8923
	WT; MS:D32								t(84)=1.835; p=0.3988
	WT; MS:D33								t(84)=4.139; p=0.0006
	WT; MS:D34								t(84)=4.299; p=0.0003
C: MEICS score	WT vs MS	Shapiro-Wilk test	0.7877; 0.6951	0.0004; 0.0001	No; No	0.6122	Yes	Two tailed Mann-Whitney U test	U=9; p=0.053	21	16
D: GITT	WT vs MS	Shapiro-Wilk test	0.9339; 0.8991	0.4515; 0.2834	Yes; Yes	0.883	Yes	Two-tailed unpaired t-test	t(17)=1.332; p=0.2003	11	8
E: AWR score	20 mmHg: WT vs MS	Shapiro-Wilk test	N too small	N too small	No	0.6022	Yes	Two tailed Mann-Whitney U test	U=79; p=0.1550	15	15
	30 mmHg: WT vs MS					0.9079	Yes	Two tailed Mann-Whitney U test	U=47.5; p=0.0053
	40 mmHg: WT vs MS					0.2241	Yes	Two tailed Mann-Whitney U test	U=55.5; p=0.016
H	Crypts depth: WT vs MS	Shapiro-Wilk test	0.963; 0.9568	0.7171; 0.6035	Yes; Yes	0.2859	Yes	Two-tailed unpaired t-test	t(30)=12.26; p<0.0001	16	16
	Villus height: WT vs MS	Shapiro-Wilk test	0.9062; 0.9374	0.2557; 0.4904		0.464	Yes	Two-tailed unpaired t-test	t(19)=3.867; p=0.001	10	11
K: Fluorescence intensity of MUC2 in LI	WT vs MS	Shapiro-Wilk test	0.9617; 0.969	0.8082; 0.8996	Yes; Yes	0.5697	Yes	Two-tailed unpaired t-test	t(22)=2.959; p=0.0072	12	12
N: Relative expression of protein	E-cadherin: WT vs MS	Shapiro-Wilk test	N too small	N too small	No	-	-	Two-way ANOVA with Sidak’s multiple comparisons test	t(12)=8.327; p<0.0001	4	4
	Occludin: WT vs MS								t(12)=3.575; p=0.0076
P: No. of tryptase positive cells	WT vs MS	Shapiro-Wilk test	0.8611; 0.9535	0.0594; 0.6886	Yes	0.2273	Yes	Two-tailed unpaired t-test	t(20)=5.280; p<0.0001	11	11
Q: 5-HT in LI	WT vs MS	Shapiro-Wilk test	0.9016; 0.9797	0.3905; 0.7269	Yes; Yes	0.6204	Yes	Two-tailed unpaired t-test	t(4)=2.924; p=0.0431	3	3
R: Relative mRNA level of cytokines	Tnf-α: WT vs MS	Shapiro-Wilk test	0.8976; 0.8935	0.3779; 0.3652	Yes; Yes	-	-	Two-way ANOVA with Sidak’s multiple comparisons test	t(18)=9.322; p<0.0001	4	4
	Cox-2: WT vs MS								t(18)=2.948; p=0.0256
	Il-1β: WT vs MS								t(18)=1.898; p=0.2057

## Sheet: Figure 4
Panel	Input data	Test for normal distribution	W value (Shapiro-Wilk test)	P value for normality test	Passed normality	P value (F test to compare variances)	Passed F test	Statistical method	p value or adjusted p value	WT (n)	MS (n)
B	WT; MS: Chao1 index	Shapiro-Wilk test	N too small	N too small	No	0.9525	Yes	Two tailed Mann-Whitney U test	U=0; p=0.0286	4	4
	WT; MS: ACE index					0.8592	Yes	Two tailed Mann-Whitney U test	U=0; p=0.0286
D	WT; MS: Shannon index	Shapiro-Wilk test	N too small	N too small	No	0.0986	Yes	Two tailed Mann-Whitney U test	U=4; p=0.3429	4	4
	WT; MS: Simpson index					0.293	Yes	Two tailed Mann-Whitney U test	U=1; p=0.0571
I	WT; MS: Gram Negative	Shapiro-Wilk test	N too small	N too small	No	0.0475	No	Two tailed Kolmogorov-Smirnov test	D=0.7500; P=0.2286	4	4
J	WT; MS: Pathogenic Potentially	Shapiro-Wilk test	N too small	N too small	No	0.0219	No	Two tailed Kolmogorov-Smirnov test	D=0.7500; P=0.2286	4	4

## Sheet: Figure 5
Panel	Input data	Test for normal distribution	W value (Shapiro-Wilk test)	P value for normality test	Passed normality	P value (Brown-Forsythe test)	Passed F Brown-Forsythe test	Statistical method	p value or adjusted p value	WT (n)	MS (n)	MS+NaB(n)
B: Ratio of sucrose preference	WT vs MS	Shapiro-Wilk test	0.8185; 0.7874; 0.8354	0.0165; 0.0209; 0.0675	No; No; Yes	0.337	Yes	Kruskal-Wallis with Dunn's multiple comparisons test	Z=2.758; p=0.0175	11	8	8
	WT vs MS+NaB								Z=0.4283; p>0.9999
	MS vs MS+NaB								Z=2.961; p=0.0092
C: Total immobility time	WT vs MS	Shapiro-Wilk test	0.9169; 0.9556; 0.8663	0.2937; 0.767; 0.1385	Yes; Yes; Yes	0.7351	Yes	Ordinary one-way ANOVA with Tukey's multiple comparisons test	q(24)=4.816; p=0.0063	11	8	8
	WT vs MS+NaB								q(24)=2.729; p=0.1522
	MS vs MS+NaB								q(24)=1.939; p=0.3713
D: Total immobility time	WT vs MS	Shapiro-Wilk test	0.8973; 0.9432; 0.9739	0.1711; 0.6427; 0.9266	Yes; Yes; Yes	0.7065	Yes	Ordinary one-way ANOVA with Tukey's multiple comparisons test	q(24)=1.413; p=0.5843	11	8	8
	WT vs MS+NaB								q(24)=0.2818; p=0.9784
	MS vs MS+NaB								q(24)=1.052; p=0.7403
E: Relative mRNA level of Iba1	WT vs MS	Shapiro-Wilk test	0.9687; 0.9077; 0.9506	0.8834; 0.4217; 0.7454	Yes; Yes; Yes	0.0541	Yes	Ordinary one-way ANOVA with Tukey's multiple comparisons test	q(15)=7.013; p=0.0005	6	6	6
	WT vs MS+NaB								q(15)=3.301; p=0.0815
	MS vs MS+NaB								q(15)=3.712; p=0.0475
G: Relative protein level of Iba1	WT vs MS	Shapiro-Wilk test	0.8854; 0.8071	0.3347; 0.0925	Yes; Yes; Yes	0.2014	Yes	Ordinary one-way ANOVA with Tukey's multiple comparisons test	q(12)=5.902; p=0.0034	5	5	5
	WT vs MS+NaB								q(12)=1.337; p=0.6231
	MS vs MS+NaB								q(12)=4.565; p=0.0184
I: Iba1+ cell bodies volume	WT vs MS	Shapiro-Wilk test	0.8823; 0.9694; 0.915	0.0032; 0.5216; 0.0199	No; Yes; No	0.8256	Yes	Kruskal-Wallis with Dunn's multiple comparisons test	Z=3.546; p=0.0012	30	30	30
	WT vs MS+NaB								Z=0.3014; p>0.9999
	MS vs MS+NaB								Z=3.244; p=0.0035
J: Maximum dendrite length	WT vs MS	Shapiro-Wilk test	0.9161; 0.9397; 0.9677	0.0726; 0.1457; 0.6809	Yes; Yes; Yes	0.7267	Yes	Ordinary one-way ANOVA with Tukey's multiple comparisons test	q(64)=1.514; p=0.5356	22	25	23
	WT vs MS+NaB								q(64)=0.2199; p=0.9868
	MS vs MS+NaB								q(64)=1.285; p=0.6369
J: Total branch length	WT vs MS	Shapiro-Wilk test	0.9561; 0.9526; 0.8971	0.4143; 0.2866; 0.022	Yes; Yes; No	0.931	Yes	Kruskal-Wallis with Dunn's multiple comparisons test	Z=3.397; p=0.002	22	25	23
	WT vs MS+NaB								Z=0.9869; p=0.9711
	MS vs MS+NaB								Z=4.456; p<0.0001
J: No. of branch points	WT vs MS	Shapiro-Wilk test	0.948; 0.9742; 0.8067	0.288; 0.7517; 0.0005	Yes; Yes; No	0.5699	Yes	Kruskal-Wallis with Dunn's multiple comparisons test	Z=2.993; p=0.0083	22	25	23
	WT vs MS+NaB								Z=1.193; p=0.6981
	MS vs MS+NaB								Z=4.26; p<0.0001
J: Total intersections per cell	WT vs MS	Shapiro-Wilk test	0.9643; 0.9782; 0.8852	0.5813; 0.8479; 0.0127	Yes; Yes; No	0.776	Yes	Kruskal-Wallis with Dunn's multiple comparisons test	Z=3.296; p=0.0029	22	25	23
	WT vs MS+NaB								Z=0.5596; p>0.9999
	MS vs MS+NaB								Z=3.912; p=0.0003
K: TNF-α in serum	WT vs MS	Shapiro-Wilk test	0.7039; 0.8226; 0.9298	0.0068; 0.1493; 0.5789	No; Yes; Yes	0.4539	Yes	Kruskal-Wallis with Dunn's multiple comparisons test	Z=2.685; p=0.0218	6	4	6
	WT vs MS+NaB								Z=2.85; p=0.0131
	MS vs MS+NaB								Z=0.1356; p>0.9999
K: IL-1β in serum	WT vs MS	Shapiro-Wilk test	0.9227; 0.7887; 0.8573	0.5249; 0.0834; 0.1801	Yes; Yes; Yes	0.001	No	Welch's ANOVA with Dunnett's T3 multiple comparisons test	q(13)=9.233; p<0.0001	6	4	6
	WT vs MS+NaB								q(13)=10.58; p<0.0001
	MS vs MS+NaB								q(13)=0.2313; p=0.9854
K: COX-2 in serum	WT vs MS	Shapiro-Wilk test	0.8489; 0.8603; 0.8254	0.1543; 0.2614; 0.0982	Yes; Yes; Yes	0.8165	Yes	Ordinary one-way ANOVA with Tukey's multiple comparisons test	q(13)=17.01; p<0.0001	6	4	6
	WT vs MS+NaB								q(13)=13.96; p<0.0001
	MS vs MS+NaB								q(13)=4.526; p=0.0178
L: 5-HT in serum	WT vs MS	Shapiro-Wilk test	0.8647; 0.9238; 0.9146	0.2059; 0.5332; 0.4957	Yes; Yes; Yes	0.0224	No	Welch's ANOVA with Dunnett's T3 multiple comparisons test	q(14)=18.62; p<0.0001	6	6	5
	WT vs MS+NaB								q(14)=3.876; p=0.0397
	MS vs MS+NaB								q(14)=13.87; p<0.0001
M: Percentage of stool water	WT vs MS	Shapiro-Wilk test	0.8961; 0.9083; 0.9636	0.1983; 0.2694; 0.8256	Yes; Yes; Yes	0.7648	Yes	Ordinary one-way ANOVA with Tukey's multiple comparisons test	q(24)=1.413; p=0.5843	10	10	10
	WT vs MS+NaB								q(24)=0.2818; p=0.9784
	MS vs MS+NaB								q(24)=1.052; p=0.7403
Q: Fluorescence intensity of MUC2 in LI	WT vs MS	Shapiro-Wilk test	0.9274; 0.9681; 0.7904	0.423; 0.8725; 0.0111	Yes; Yes; No	0.4726	Yes	Kruskal-Wallis with Dunn's multiple comparisons test	Z=3.327; p=0.0026	10	10	10
	WT vs MS+NaB								Z=0.9652; p>0.9999
	MS vs MS+NaB								Z=4.293; p<0.0001
S: No. of tryptase positive cells	WT vs MS	Shapiro-Wilk test	0.8769; 0.9693; 0.9554	0.12; 0.8845; 0.7328	Yes; Yes; Yes	0.4102	Yes	Ordinary one-way ANOVA with Tukey's multiple comparisons test	q(27)=8.461; p<0.0001	10	10	10
	WT vs MS+NaB								q(27)=0.4317; p=0.95
	MS vs MS+NaB								q(27)=8.893; p<0.0001
T: 5-HT in intestine	WT vs MS	Shapiro-Wilk test	0.8931; 0.9845; 0.865	0.3347; 0.9716; 0.2068	Yes; Yes; Yes	0.9031	Yes	Ordinary one-way ANOVA with Tukey's multiple comparisons test	q(15)=15.02; p<0.0001	6	6	6
	WT vs MS+NaB								q(15)=3.419; p=0.07
	MS vs MS+NaB								q(15)=11.6; p<0.0001
