# Supplementary material
Source: Research Square preprint supplement (doi:10.21203/rs.3.rs-9384634/v1)
Supplement: Supplementary file 2 [file 93c4636c06ee89c3d291323e.docx]

**Graphic abstract**

**
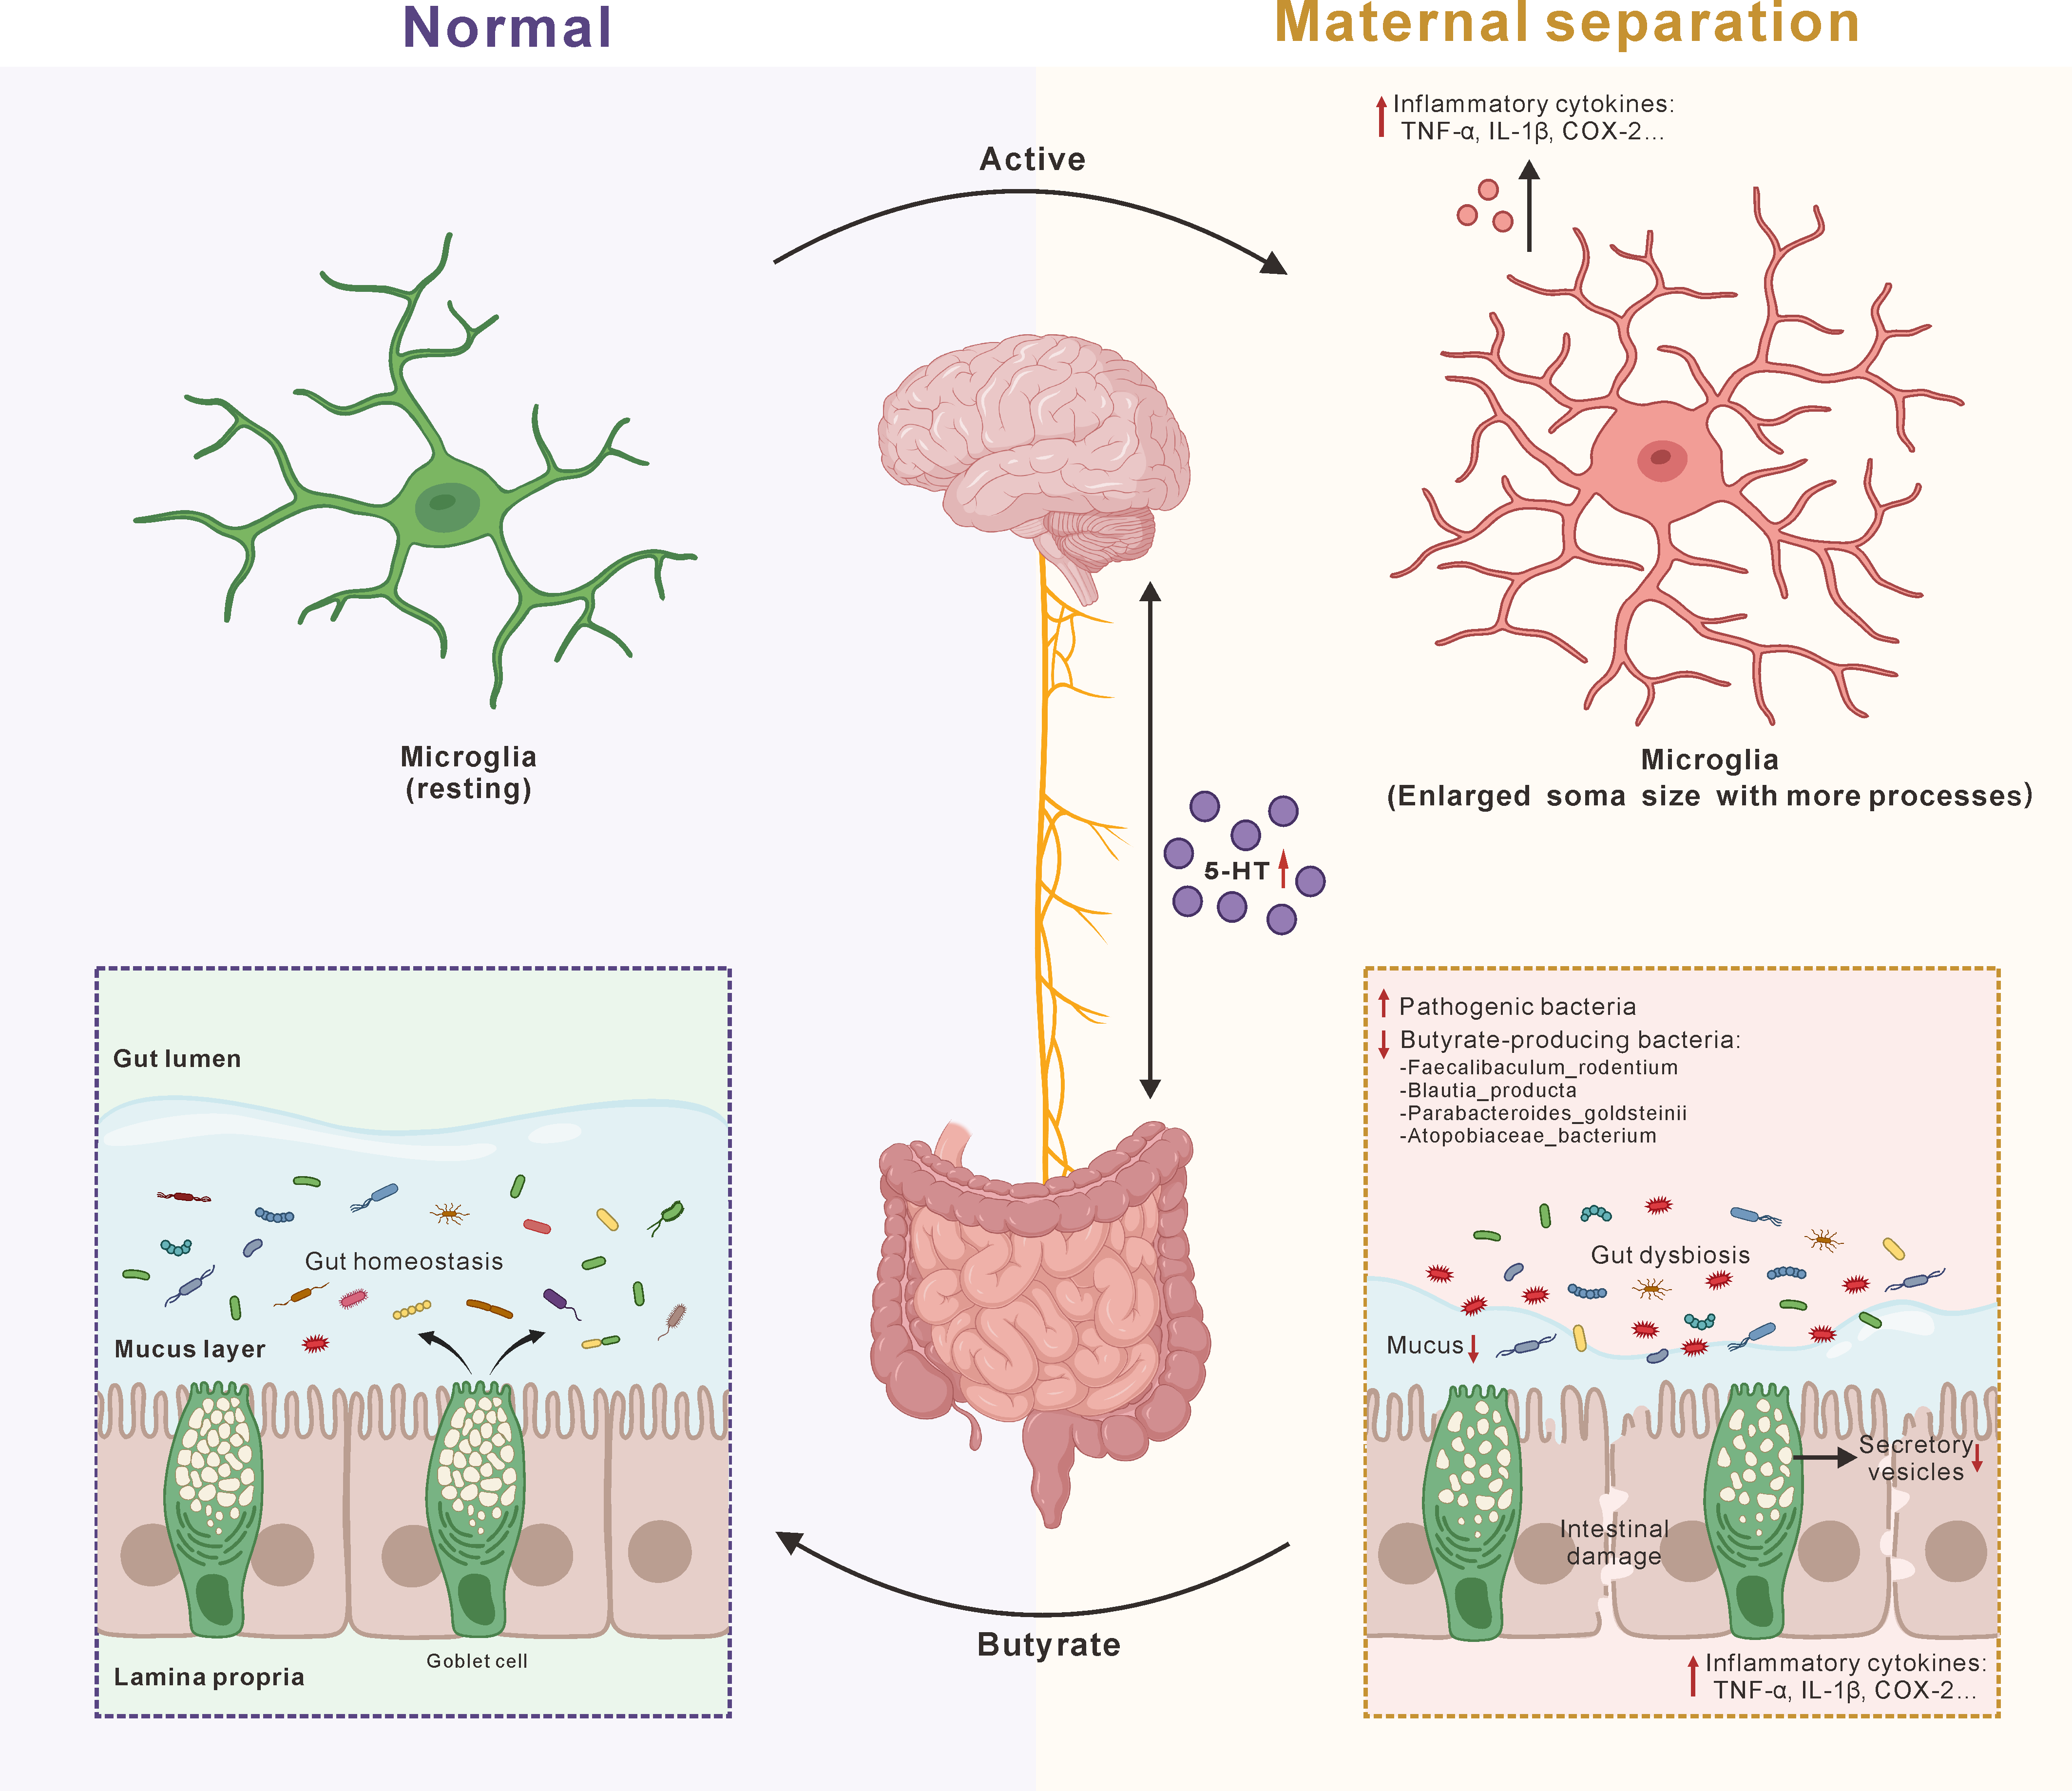
**

1. Early-life stress, such as neonatal maternal separation, induces microglia-driven neuroinflammation and elevated serotonin.
2. Persistent immune imbalance promotes IBS-like gut dysfunction, including impaired intestinal barrier integrity, mucus thinning, and low-grade inflammation.

3. Gut microbiota dysbiosis with reduced butyrate-producing bacteria contributes to these alterations, whereas oral butyrate supplementation rescues brain-gut dysfunctions.
